# Supplementary material for: Anorexia Nervosa: A Unified Neurological Perspective
Source: PubMed Central journal article supplement — Int J Med Sci. 2011 Oct 22;8(8):679–703. doi: 10.7150/ijms.8.679 (PMC3204438; doi:10.7150/ijms.8.679), 2011-10-22
Supplement: ijmsv08p0679s1.pdf [file ijmsv08p0679s1.pdf]

## ABBREVIATIONS

|                                                                         |                                                                        |                                                            |
|-------------------------------------------------------------------------|------------------------------------------------------------------------|------------------------------------------------------------|
| <b>AN</b> – Anorexia Nervosa                                            | <b>PPAR</b> – Peroxisome proliferator-activated receptor               | <b>β-EP</b> – β-endorphin                                  |
| <b>RAN</b> – Restrictive type                                           | <b>NPY</b> – Neuropeptide Y                                            | <b>GOAT</b> – ghrelin O-acyl-transferase                   |
| <b>BPAN</b> – binge-eating/purging-type                                 | <b>ACTH</b> – Adrenocorticotrophic hormone                             | <b>ARCH</b> – Arcuate nucleus of hypothalamus              |
| <b>HPA</b> – Hypothalamo-pituitary-adrenal                              | <b>CNS</b> – Central nervous system                                    | <b>GH</b> – Growth hormone                                 |
| <b>CRF</b> – Corticotrophin-releasing factor                            | <b>ANS</b> – Autonomic nervous system                                  | <b>AgRP</b> – Agouti-related protein                       |
| <b>CRH</b> – Corticotrophin-releasing hormone                           | <b>PNS</b> – Peripheral nervous system                                 | <b>mRNA</b> – mitochondrial ribonucleic acid               |
| <b>IGF-1</b> – Insulin-like-growth-factor-1                             | <b>SNS</b> – Sympathetic nervous system                                | <b>BMI</b> – Body mass index                               |
| <b>FFA</b> – Free fatty acids                                           | <b>β-LP</b> – β-lipotropin                                             | <b>UCN</b> - Urocortin                                     |
| <b>PVNH</b> – Paraventricular nucleus of hypothalamus                   | <b>ASV-30</b> – Antisauvignine-30                                      | <b>CSF</b> – Cerebrospinal fluid                           |
| <b>Mek-1/2</b> – mitogen-activated extracellular signal-related kinases | <b>PEK</b> – cyclic adenosine monophosphate -dependent protein kinases | <b>BLA</b> – basolateral complex of amygdala               |
| <b>SOCT</b> – subjects of constitutional thinness                       | <b>POMC</b> – pro-opiomelanocortin                                     | <b>N/OFQ</b> – Nociceptin/orphanin FQ                      |
| <b>NOP</b> – nociceptin                                                 | <b>SF-1</b> – Steroidogenic factor                                     | <b>CART</b> – cocaine-and amphetamine-regulated transcript |
| <b>VMH</b> – Ventromedial hypothalamus                                  | <b>OCD</b> – Obsessive-compulsive disorder                             | <b>NA</b> – noradrenaline                                  |
| <b>BAT</b> – Brown adipose tissue                                       | <b>MC3R</b> – melanocortin-3                                           | <b>MC4R</b> - melanocortin-4                               |
